# Supplementary material
Source: publisher figshare collection journal article supplement (https://frontiersin.figshare.com/ndownloader/files/25111214)
Supplement: Supplementary file [file 25111214]

## **Supplementary Figures**

**for**

### **Identification of growth inhibitors of the fish pathogen *Saprolegnia parasitica* using *in silico* subtractive proteomics, computational modelling and biochemical validation**

Sanjiv Kumar, Rahul Shubhra Mandal, Vincent Bulone and Vaibhav Srivastava<sup>\*</sup>

## Effects of selected compounds on the growth of *S. parasitica*'s mycelium

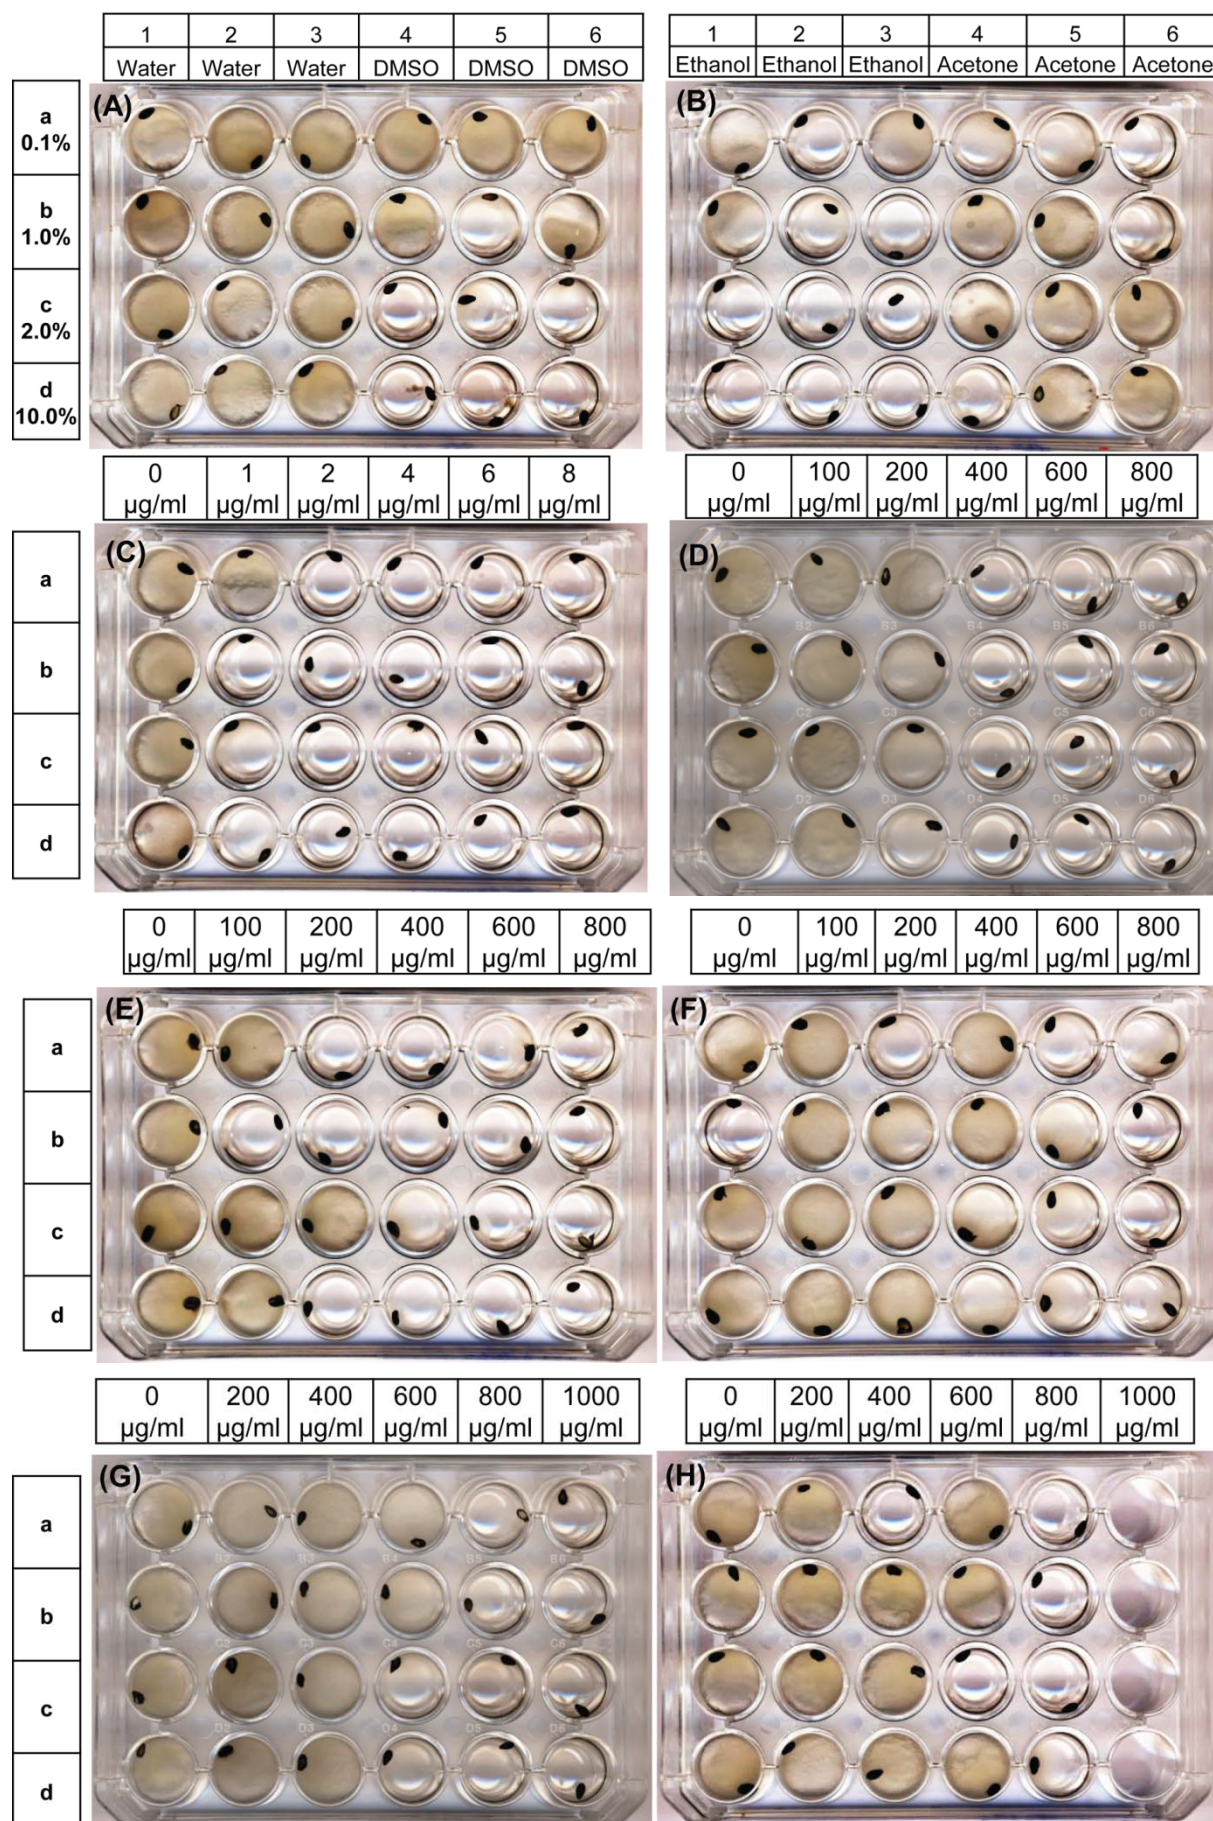



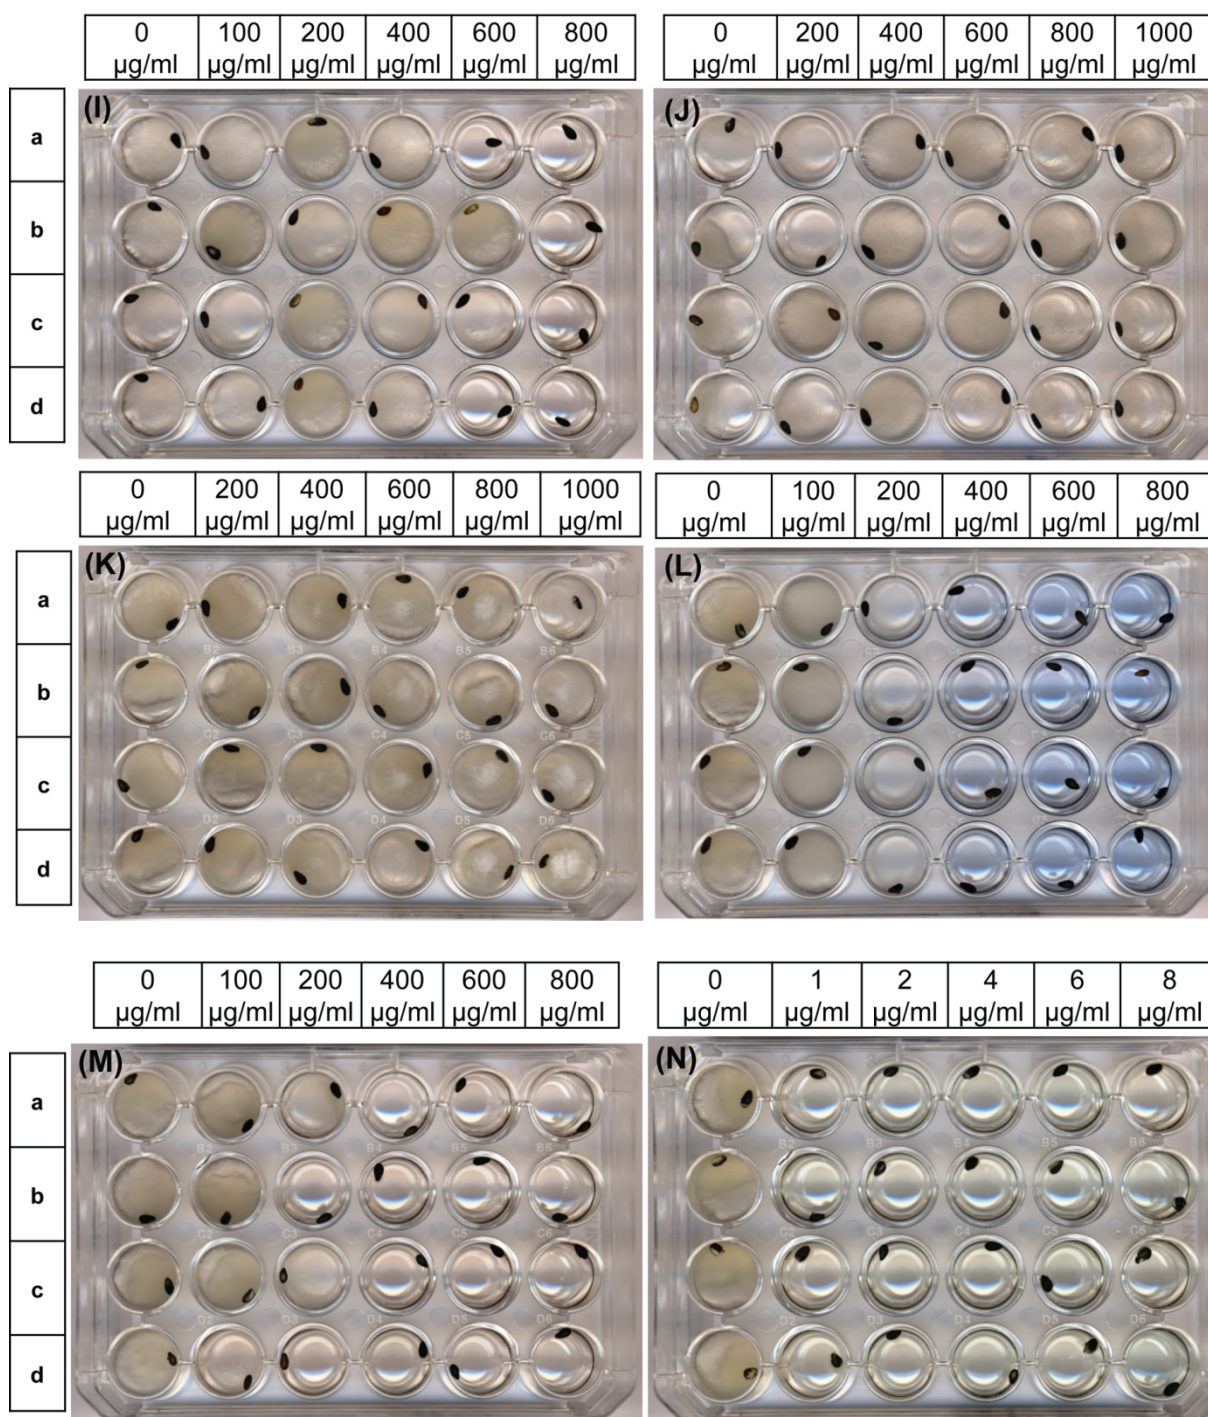

**Supplementary Figure S1: Effects of selected compounds on the growth of *S. parasitica* mycelium in liquid Machlis medium.** A: Water and DMSO control, B: Ethanol and acetone controls, C: Triclosan, D: Benzoic Acid, E: Acetohydroxamic Acid, F: Sulfamethoxazole, G: Chloramphenicol, H: Azelaic acid, I: Glycerol, J: Albendazole, K: Thiabendazole, L: Copper sulfate, M: Boric acid, N: Malachite green. Rows A-D in each panel represent 4 replicates of the conditions mentioned at the top of each plate.

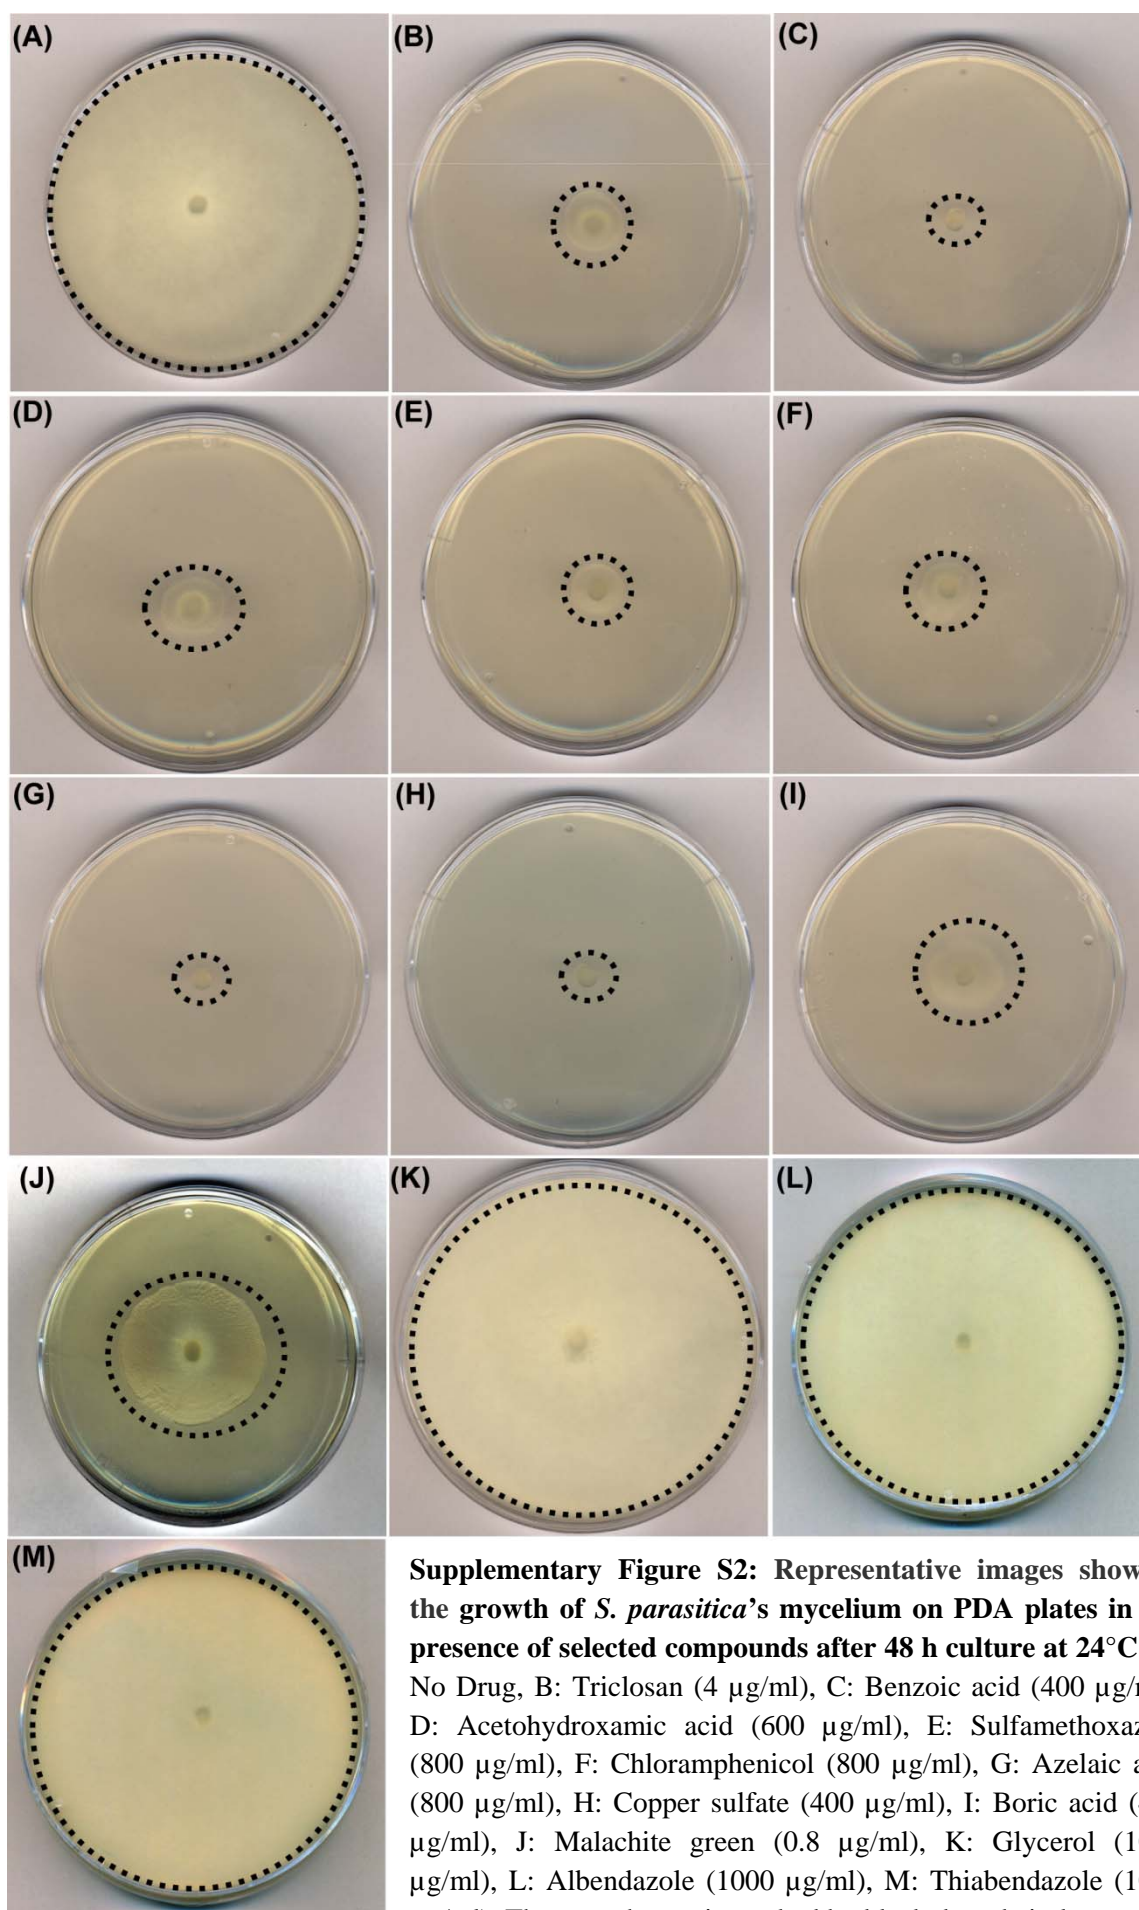

**Supplementary Figure S2: Representative images showing the growth of *S. parasitica*'s mycelium on PDA plates in the presence of selected compounds after 48 h culture at 24°C.** A: No Drug, B: Triclosan (4  $\mu\text{g/ml}$ ), C: Benzoic acid (400  $\mu\text{g/ml}$ ), D: Acetohydroxamic acid (600  $\mu\text{g/ml}$ ), E: Sulfamethoxazole (800  $\mu\text{g/ml}$ ), F: Chloramphenicol (800  $\mu\text{g/ml}$ ), G: Azelaic acid (800  $\mu\text{g/ml}$ ), H: Copper sulfate (400  $\mu\text{g/ml}$ ), I: Boric acid (400  $\mu\text{g/ml}$ ), J: Malachite green (0.8  $\mu\text{g/ml}$ ), K: Glycerol (1000  $\mu\text{g/ml}$ ), L: Albendazole (1000  $\mu\text{g/ml}$ ), M: Thiabendazole (1000  $\mu\text{g/ml}$ ). The growth area is marked by black dotted circle.



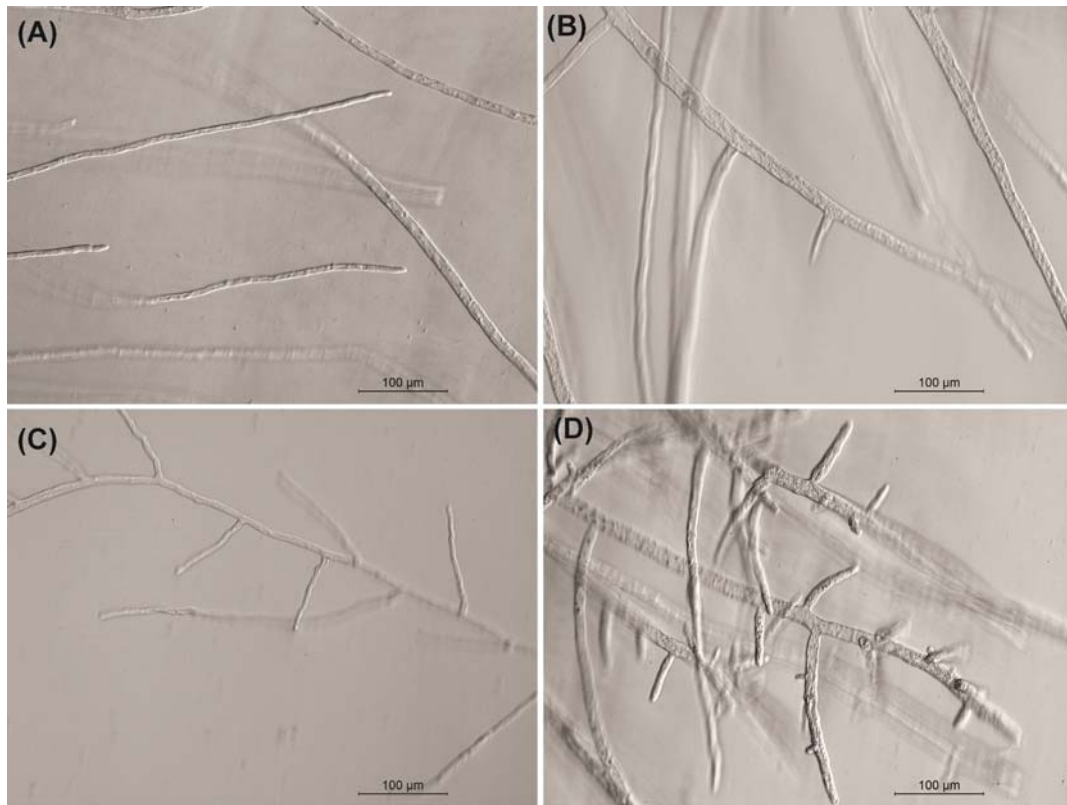

**Supplementary Figure S3: Effect of different concentration of Triclosan on the level of hyperbranching in *S. parasitica* hyphae after 24 h culture at 24°C in Machlis medium. A: No Drug, B: Triclosan (1 μg/ml), C: Triclosan (2 μg/ml), D: Triclosan (4 μg/ml). Scale bars =100μm.**
